# Supplementary material for: Activated Notch1 Target Genes during Embryonic Cell Differentiation Depend on the Cellular Context and Include Lineage Determinants and Inhibitors
Source: PLoS One. 2010 Jul 8;5(7):e11481. doi: 10.1371/journal.pone.0011481 (PMC2900208; doi:10.1371/journal.pone.0011481)
Supplement: Table S2 — Gene expression assays of Notch1 target genes. Summary of gene expression assays used to determine relative expression levels of 30 potential Notch1 target genes after induction of Notch signaling. (0.02 MB XLS) [file pone.0011481.s002.xls]

## Sheet: Tabelle1
Gene	Assay ID	Context Sequence	Target Exons	NCBI Gene Reference
Adm	Mm00437438_g1	CCCTACAAGCCAGCAATCAGAGCGA	3	NM_009627.1,BC052665.1,AK144181.1,AK144649.1,AK171066.1,U77630.1
Efna1	Mm00438660_m1	TTCAAATCCCAAGTTCCGTGAGGAG	1	NM_010107.2,AA738854.1,U26188.1,U90662.1,BC002046.1,AK009144.1
Efnb1	Mm00438666_m1	CTGGAGCTCTCTTAACCCTAAGTTC	1	NM_010110.2,Z48781.1,U12983.1,BC021656.1,BC018572.1,AK034996.1,BC006797.1
Epha4	Mm00433056_m1	GCCCTCTGGAAGGAGGGTGGGAGGA	2	NM_007936.3,X65138.1,S57168.1,BC004782.1,AK028509.1,BC052164.1,AK132203.1,AK147698.1
Epha7	Mm00833876_m1	ACTCTACTTTCATTTTAAATTTCCA	9	NM_010141.2,X81466.1,X79082.1,AK030480.1
Fgf5	Mm00438919_m1	CCATGCAAGTGCCAAATTTACGGAT	2	NM_010203.2,M30643.1,BC071227.1,AK028694.1,AK028894.1
Hes1	Mm00468601_m1	ACTTAAGAAAGATAGCTCCCGGCAT	2	NM_008235.2,BC018375.1,BC051428.1,AK132536.1,AK133538.1
Hes5	Mm00439311_g1	TGAAACACAGCAAAGCCTTCGCCGC	2	NM_010419.2,AK078170.1,AK087508.1,BC099864.1,BC099863.1,BC099865.1,AK139390.1,AK156545.1,BC103539.1
Hes7	Mm00473576_m1	GGACGGCCCCAAGATGCTGAAGCCG	1	NM_033041.2,AB049065.1,AK050791.1
Hey1	Mm00468865_m1	GCAGGAGGGAAAGGTTATTTTGACG	4	NM_010423.1,AF151521.1,AF172286.1,AF176423.1,AJ243895.1,AB041590.1,AF232241.1,BC086635.1,AK011149.1,AK140212.1
Hey2	Mm00469280_m1	ATTACCCTGGGCACGCTACAAGCTC	1	NM_013904.1,AF172287.1,AF173902.1,AF232240.1,AJ271867.1,AB093589.1,AK031506.1,AK158000.1,BC103575.1,BC103576.1,BC105651.1,BC105652.1
Heyl	Mm00516555_m1	TCTTAGCCAGATGGCCAGGCCGCTG	1	NM_013905.2,AF172288.1,AJ271868.2,AB093590.1,AK028596.1,AK080822.1
Hspb8	Mm00446103_m1	TACGTGGAAGTTTCAGGCAAACATG	1	NM_030704.1,AF273453.1,BC011219.1,AF250139.1,BC003971.1,AK005052.1			mCT18516.1	5 F;5 59.0 cM
Id1	Mm00775963_g1	GCCTTGGCGGCCGAGGCGGCATGTG	1	NM_010495.1,AI326229.1,M31885.1,BG063153.2,BG076619.2,BC025073.1,AB221668.1
Id2	Mm00711781_m1	AATAAATGGCATTTGGGGACTTTTT	2	NM_010496.2,M69293.1,BC053699.1,AK003222.1,AK013378.1,AK135547.1,AK146346.1,AK146606.1,BC006921.1
Id3	Mm00492575_m1	CTGGCACCTCCCGAACGCAGGTGCT	2	NM_008321.1,M60523.1,AW557873.1,AK002820.1
Id4	Mm00499701_m1	GGATGGCCAGGTGTGCGGCCGCCTG	3	NM_031166.1,X75018.1,AK041164.1
Kitl	Mm00442972_m1	GACATTACAAAACTGGTGGCAAATC	2	NM_013598.1,X95381.1,Y10287.1,X95380.1,X95379.1,X68989.1,U44725.1,X99322.1,M64262.1,M57647.1,M59915.1,S40364.1,S40534.1,S40536.1,BC011322.1,AK018777.1,AK041961.1,AK134301.1,AK165233.1
Lfng	Mm00456128_m1	CTCGCGCCACAAGGAGATGACGTTC	1	NM_008494.2,AF015768.1,U94351.1,AK004642.1,AK153283.1
Mnt	Mm00487729_m1	AACAGAGAGCACGTGAGGAGCAGGA	1	NM_010813.2,Y07609.1,U77356.1,BC054534.1,AK147933.1
Myf5	Mm00435125_m1	TGTATCAAATGCATGTGCTGCAGAT	2	NM_008656.3,X56182.1,AF336978.1,AK044894.1,AK083402.1
Nanog	Mm02384862_g1	TGATTCAGAAGGGCTCAGCACCAGT		NM_028016.1,AY455282.1,AY455285.1,AB126939.1,AF507043.1,AB093574.1,AY278951.1,AK010332.1,AK167259.1
Nes	Mm00450205_m1	GCTACATACAGGACTCTGCTGGAGG	2	NM_016701.3,AF076623.2,AK031207.1,BC060693.1,AK009706.1,BC062893.1
Nodal	Mm00443040_m1	TCCAGGCGCAAGATGTGGACGTGAC	1	NM_013611.3,X70514.1,AK049290.1,AK082823.1
Pax6	Mm00443072_m1	CATGCAGAACAGTCACAGCGGAGTG	3	NM_013627.2,X63963.1,AF457142.1,AK032616.1,AK045805.1,AJ292077.1,AJ307468.1,BC011272.1,BC036957.1,AK028059.1
Pou5f1 (Oct4)	Mm00658129_gH	GGGCGTTCTCTTTGGAAAGGTGTTC	2	NM_013633.1,X52437.1,M34381.1,BC068268.1,AB221654.1,AK145321.1
Runx1	Mm00486762_m1	GAGAACCCCGAAATGCCAGGCAGAT	3	NM_009821.1,D26532.1,BC069929.1,AK051758.1
Sox9	Mm00448840_m1	CGAGCACTCTGGGCAATCTCAGGGT	2	NM_011448.2,AK220197.1,BC034264.1,AK031516.1,AF421878.1,BC024958.1,BC023953.1,BC023796.1,BC023808.1,AK030187.1,AK049986.1
Vcam1	Mm00449197_m1	GGAGGTCTACTCATTCCCTGAAGAT	5	NM_011693.2,X67783.1,M84487.1,BC011159.1,BC029823.1,CT010373.1,AK143401.1,AK162954.1,AK169722.1
Wisp1	Mm00457574_m1	GGCCACGGCCCTCTCTCCAACCCCC	1	NM_018865.1,AB004873.1,AF100777.1,BC052677.1,BC048791.1,AK013300.1,AK148457.1
Wnt4	Mm00437341_m1	AGGTGGTGACACAAGGGACCCGGGA	2	NM_009523.1,AI323302.1,M89797.1,BC103560.1,BC103561.1,BC103562.1,BC101962.1
